# Supplementary material for: The Evaluation of Videos about Branched-Chain Amino Acids Supplements on YouTube TM: A Multi-Approach Study
Source: MDPI journal article supplement (doi:10.3390/ijerph192416659), 2022-12-11
Supplement: s1 [file s1]

## Supplementary Materials

**Table S1.** The questions of DISCERN instrument.

|                                                                                                                                                        | No                                       |   | Partially                                                 |   | Yes                         |
|--------------------------------------------------------------------------------------------------------------------------------------------------------|------------------------------------------|---|-----------------------------------------------------------|---|-----------------------------|
|                                                                                                                                                        | 1                                        | 2 | 3                                                         | 4 | 5                           |
| 1. Are the aims clear?                                                                                                                                 |                                          |   |                                                           |   |                             |
| 2. Does it achieve its aims?                                                                                                                           |                                          |   |                                                           |   |                             |
| 3. Is it relevant?                                                                                                                                     |                                          |   |                                                           |   |                             |
| 4. Is it clear what sources of information were used to compile the publication (other than the author or producer)?                                   |                                          |   |                                                           |   |                             |
| 5. Is it clear when the information used or reported in the publication was produced?                                                                  |                                          |   |                                                           |   |                             |
| 6. Is it balanced and unbiased?                                                                                                                        |                                          |   |                                                           |   |                             |
| 7. Does it provide details of additional sources of support and information?                                                                           |                                          |   |                                                           |   |                             |
| 8. Does it refer to areas of uncertainty?                                                                                                              |                                          |   |                                                           |   |                             |
| 9. Does it describe how each treatment works?                                                                                                          |                                          |   |                                                           |   |                             |
| 10. Does it describe the benefits of each treatment?                                                                                                   |                                          |   |                                                           |   |                             |
| 11. Does it describe the risks of each treatment?                                                                                                      |                                          |   |                                                           |   |                             |
| 12. Does it describe what would happen if no treatment is used?                                                                                        |                                          |   |                                                           |   |                             |
| 13. Does it describe how the treatment choices affect overall quality of life?                                                                         |                                          |   |                                                           |   |                             |
| 14. Is it clear that there may be more than one possible treatment choice?                                                                             |                                          |   |                                                           |   |                             |
| 15. Does it provide support for shared decision-making?                                                                                                |                                          |   |                                                           |   |                             |
|                                                                                                                                                        | Low                                      |   | Moderate                                                  |   | High                        |
|                                                                                                                                                        | <i>Serious or extensive shortcomings</i> |   | <i>Potentially important but not serious shortcomings</i> |   | <i>Minimal shortcomings</i> |
|                                                                                                                                                        | 1                                        | 2 | 3                                                         | 4 | 5                           |
| 16. Based on the answers to all of the above questions, rate the overall quality of the publication as a source of information about treatment choices |                                          |   |                                                           |   |                             |

[http://www.discrim.org.uk/discrim\\_instrument.php](http://www.discrim.org.uk/discrim_instrument.php) (accessed on 15 October 2022).

**Table S2.** Journal of the American Medical Association (JAMA) benchmark criteria [35].

| Criteria           | Description                                                                                                                         | No | Yes |
|--------------------|-------------------------------------------------------------------------------------------------------------------------------------|----|-----|
| <b>Authorship</b>  | Authors, contributors, affiliations, and credentials should be listed                                                               | 0  | 1   |
| <b>Attribution</b> | References, sources, and relevant copyright information should be listed                                                            | 0  | 1   |
| <b>Disclosure</b>  | Web site ownership, sponsorship, advertising, commercial funding, underwriting and potential conflict of interests should be listed | 0  | 1   |
| <b>Currency</b>    | Date of original posting and dates of updates should be indicated                                                                   | 0  | 1   |

**Table S3.** Global Quality Score criteria [53].

| Description                                                                                                                        | Global Quality Score |
|------------------------------------------------------------------------------------------------------------------------------------|----------------------|
| Poor quality, poor flow, most information missing, not useful for viewers                                                          | 1                    |
| Generally poor quality and poor flow, some information listed but many important topics missing, of very restricted use to viewers | 2                    |
| Moderate quality, suboptimal flow, some important information is adequately discussed, somewhat useful for viewers                 | 3                    |
| Good quality and generally good flow, most relevant information is covered, but some topics not listed, useful for viewers         | 4                    |
| Excellent quality, excellent flow, very useful for viewers                                                                         | 5                    |
